# Supplementary material
Source: PubMed Central journal article supplement (PMC2806242)
Supplement: NIHMS153857-supplement-2.pdf [file NIHMS153857-supplement-2.pdf]

## APPENDIX 2

**Table A1.** Analysis of inter-measurement variability.

| Lag measurements compared                                                                                | Parameter studied | Slope of bias function | Slope of bias function, test of significant difference from zero |     |                   | Slope of variability function | Slope of variability function, test of significant difference from zero |     |                   |
|----------------------------------------------------------------------------------------------------------|-------------------|------------------------|------------------------------------------------------------------|-----|-------------------|-------------------------------|-------------------------------------------------------------------------|-----|-------------------|
|                                                                                                          |                   |                        | t                                                                | Dof | p                 |                               | t                                                                       | Dof | p                 |
| MBR and NR                                                                                               | Mean lag          | -0.003                 | 0.02                                                             | 27  | 0.98              | NA                            |                                                                         |     |                   |
| MBR and MEM                                                                                              | Mean lag          | -0.82                  | 8.2                                                              | 28  | <b>&lt;0.0001</b> | NA                            |                                                                         |     |                   |
| NR and MEM                                                                                               | Mean lag          | -0.82                  | 7.7                                                              | 27  | <b>&lt;0.0001</b> | NA                            |                                                                         |     |                   |
| MBR (standardized 40 cm target estimates):<br>first and second measurements <i>within</i> visit          | Age               | -0.0002                | 0.06                                                             | 170 | 0.95              | -0.004                        | 1.6                                                                     | 170 | 0.11              |
|                                                                                                          | Astigmatism       | 0.02                   | 0.8                                                              | 170 | 0.45              | 0.01                          | 0.6                                                                     | 170 | 0.53              |
|                                                                                                          | SE                | -0.05                  | 3.5                                                              | 170 | <b>0.0005</b>     | 0.02                          | 1.8                                                                     | 170 | 0.07              |
| MBR (standardized 40 cm target estimates):<br>first and second measurements <i>within</i> visit          | Mean lag          | -0.01                  | 0.2                                                              | 198 | 0.81              | 0.25                          | 9.8                                                                     | 198 | <b>&lt;0.0001</b> |
| MBR (67 cm retinoscope measures):<br>first and second measurements <i>within</i> visit                   | Mean lag          | 0.22                   | 6.9                                                              | 190 | <b>&lt;0.0001</b> | 0.22                          | 12.5                                                                    | 190 | <b>&lt;0.0001</b> |
| MBR (standardized 40 cm target estimates):<br>Day 1 and Day 2 ( <i>first</i> measurement of each visit)  | Mean lag          | 0.33                   | 1.9                                                              | 26  | 0.06              | 0.43                          | 6.3                                                                     | 26  | <b>&lt;0.0001</b> |
| MBR (standardized 40 cm target estimates):<br>Day 1 and Day 2 ( <i>second</i> measurement of each visit) | Mean lag          | -0.08                  | 0.8                                                              | 28  | 0.43              | 0.11                          | 1.8                                                                     | 28  | 0.09              |

MBR: modified bell retinoscopy

NR: Nott retinoscopy

MEM: monocular estimate method

NA: not applicable

SE: spherical equivalent refractive error

Dof: degrees of freedom.
